# Supplementary material for: Targeting IL-1β as an immunopreventive and therapeutic modality for K-ras–mutant lung cancer
Source: PubMed Central journal article supplement (PMC9220853; doi:10.1172/jci.insight.157788), 2022-06-08
Supplement: jciinsight-7-157788-s071.pdf [file jciinsight-7-157788-s071.pdf]

# **Targeting IL-1 $\beta$ as an Immune Preventive and Therapeutic Modality for *K-ras* Mutant Lung Cancer**

Bo Yuan, Michael J. Clowers, Walter V. Velasco, Stephen Peng, Qian Peng, Yewen Shi, Marco Ramos-Castaneda, Melody Zarghooni, Shuanying Yang, Rachel L. Babcock, Seon Hee Chang, John V. Heymach, Jianjun Zhang, Edwin J. Ostrin, Stephanie S. Watowich, Humam Kadara, Seyed Javad Moghaddam

**Online Data Supplement**

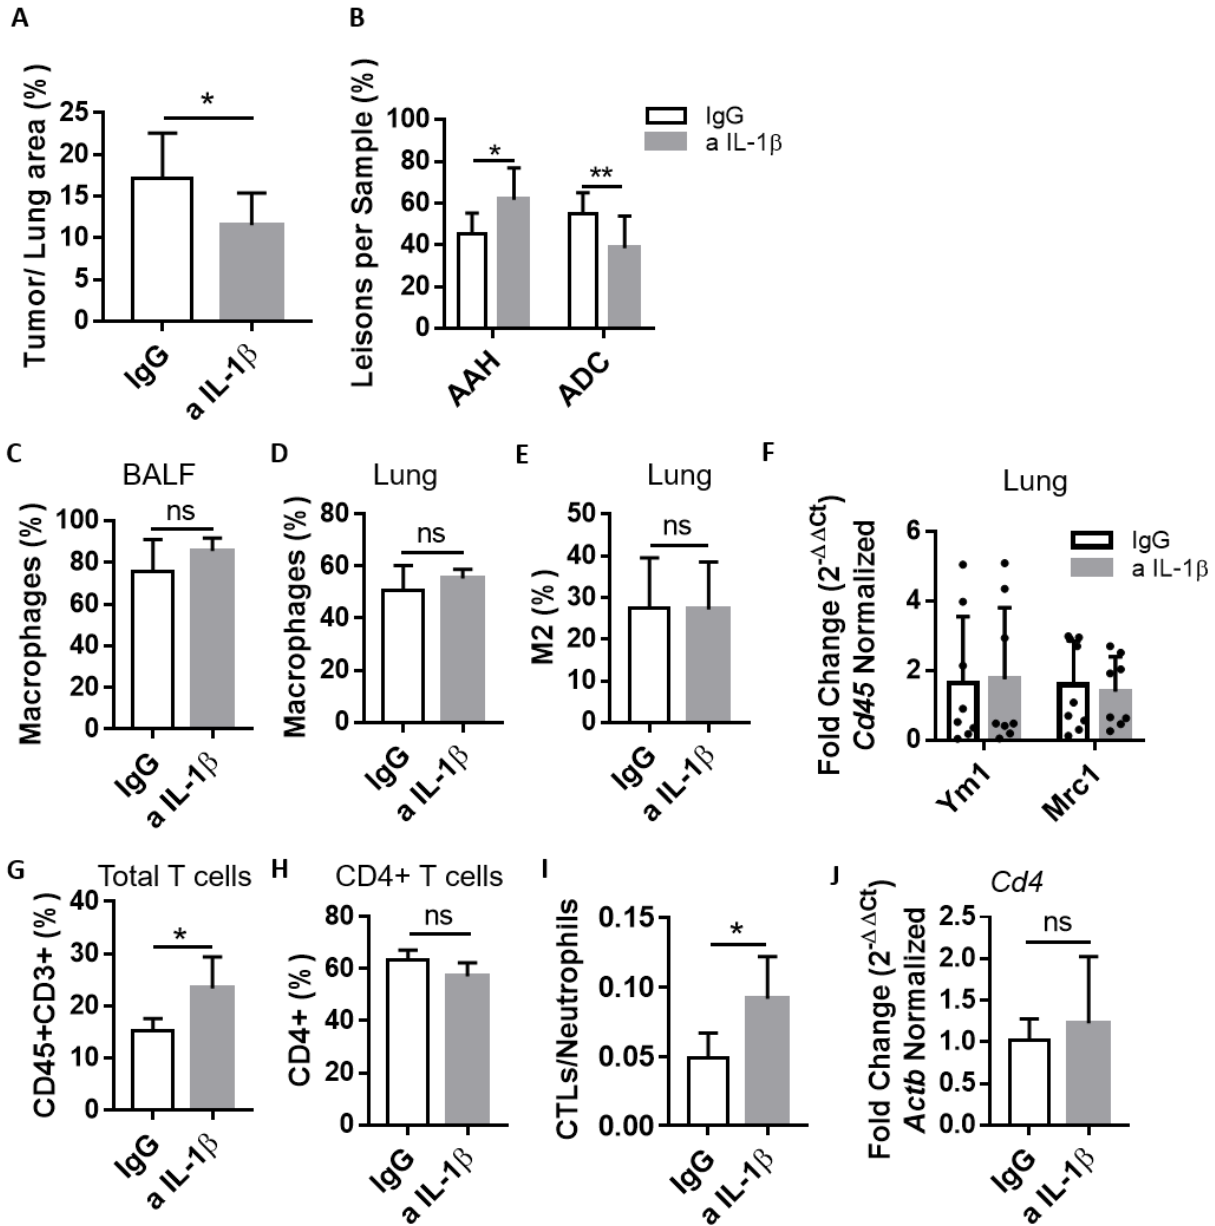

**Supplementary Figure S1.** (A) Tumor/Lung area percentage (n=7). (B) The proportion of atypical adenomatous hyperplasia (AAH) or adenoma/adenocarcinoma (ADC) lesions in each sample (n=7). Percentage of total macrophages in the (C) bronchoalveolar lavage fluid (BALF) and (D) the whole lung (n=3-4). (E) Percentage of M2 macrophages in the whole lung (n=3-4). (F) Relative mRNA expression of *Ym1*, *Mrc1* in the whole lung, normalized to *Cd45* expression (n=8-9). (G) Percentage of CD3+ T cells in the whole lung (n=3-4). (H) Percentage of CD4+ T cells in the whole lung (n=4-5). (I) The ratio of IFN- $\gamma$  expressing CD8+ T cells (CTLs) to neutrophils among all the CD45 positive populations at 14-week-old mice (n=4-5). (J) Relative mRNA expression of *Cd4* in the whole lung, normalized to *Actb* expression (n=7-9). Data represent mean  $\pm$  SEM; unpaired t-test, \* $p$ <0.05, \*\* $p$ <0.01.

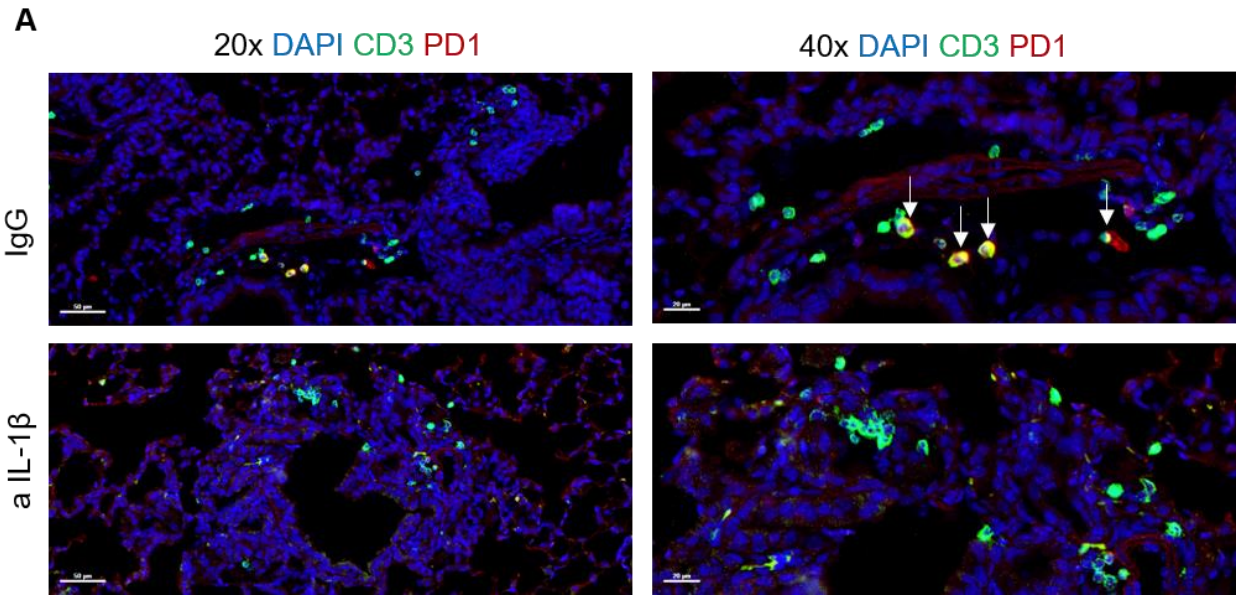

**Supplementary Figure S2.** (A) Fluorescent multiplex immunohistochemistry visualization of CD3 and PD-1 co-expressing cells (20x scale bar= 50 $\mu$ m; 40x scale bar= 20 $\mu$ m).

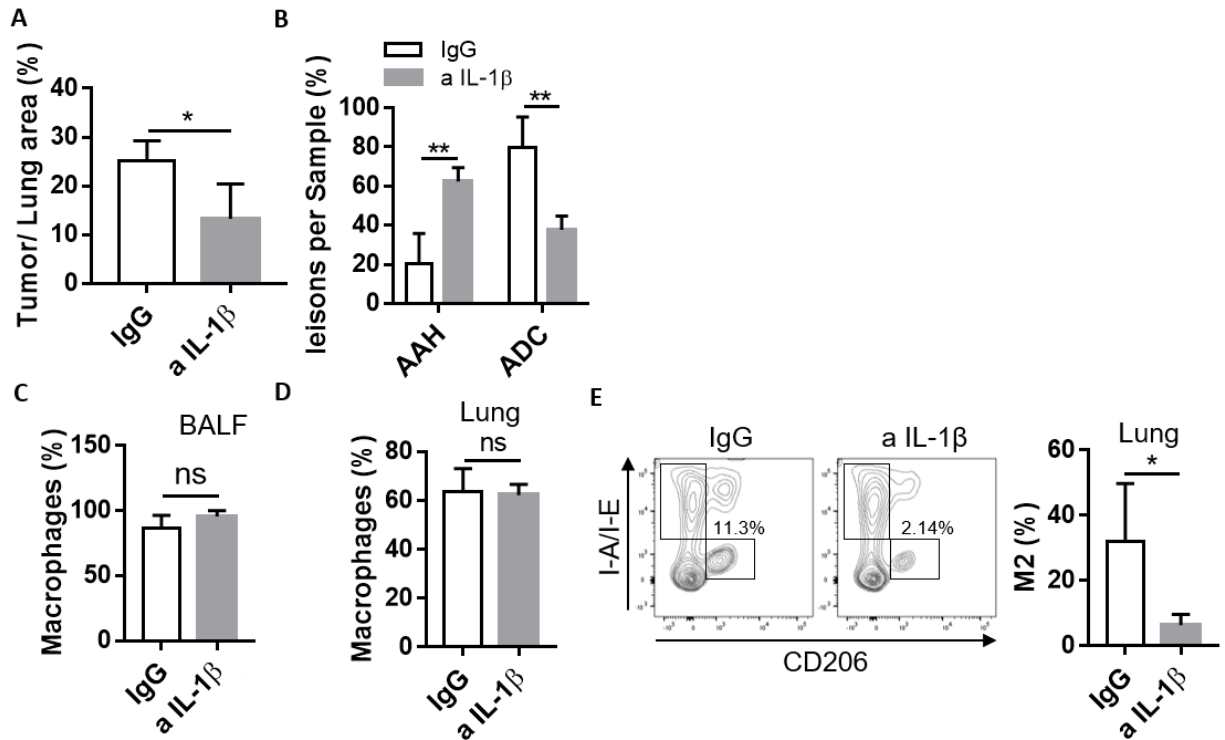

**Supplementary Figure S3.** (A) Tumor/Lung area percentage (n=4). (B) The proportion of AAH or adenoma/adenocarcinoma lesions in each sample (n= 4). Percentage of total macrophages in the (C) BALFs and (D) the whole lungs (n=3-6). (E) Percentage of M2 macrophages in the whole lungs (n=3-6).

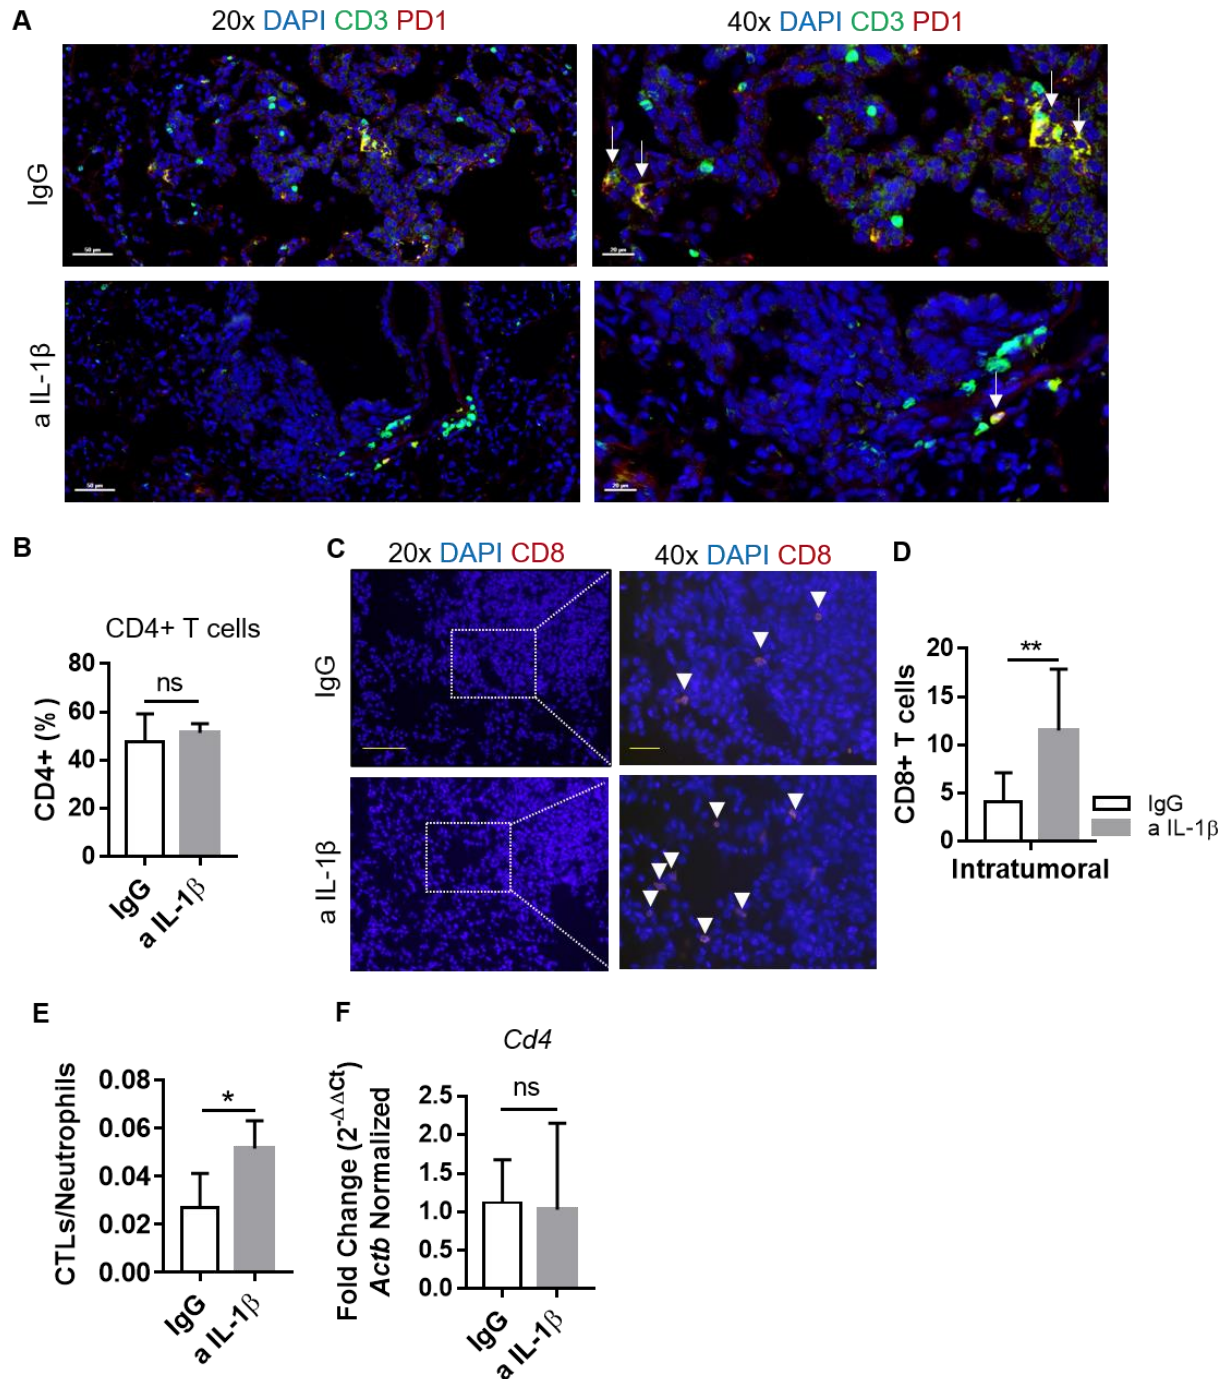

**Supplementary Figure S4.** (A) Fluorescent multiplex immunohistochemistry visualization of CD3 and PD-1 co-expressing cells (20x scale bar= 50μm; 40x scale bar= 20μm). (B) Percentage of CD4+ T cells in the whole lung (n=4-6). (C) Representative photomicrographs and (D) quantification of immunofluorescence staining with anti-CD8 (red) and DAPI (blue) in tumor lesions (20x scale bar= 50μm; 40x scale bar= 20μm) (n=10). (E) The ratio of CTLs to neutrophils among all the CD45 positive populations at 18-week-old mice (n=4-5). (F) Relative mRNA expression of *Cd4* in the whole lung, normalized to *Actb* expression (n= 4-5). Data represent mean ± SEM; unpaired t-test, \*\* $p < 0.01$ , \* $p < 0.05$ .

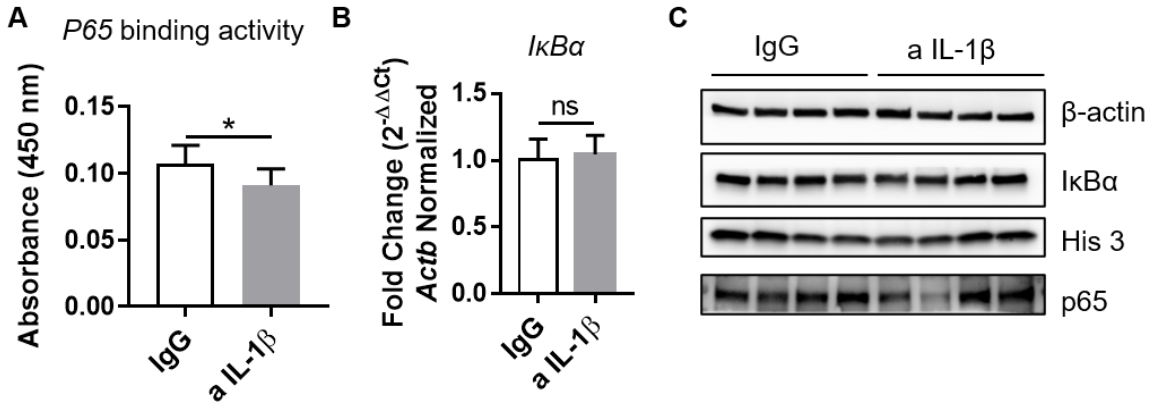

**Supplementary Figure S5.** (A) p65 binding activity of whole lung nuclear protein from 14-week-old CC-LR mice presented by OD value (n= 5-6). (B) Relative mRNA expression of *IkBa* in the whole lung of 18-week-old CC-LR mice, normalized to *Actb* expression (n= 4-5). (C) Western blot analysis of *IkBa*,  $\beta$ -actin protein levels in whole lung tissue and p65, Histone H3 (His H3) protein level in whole lung tissue nuclear extracts of 18-week-old CC-LR mice. Data represent mean  $\pm$  SEM; unpaired t-test, ns: not significant.

A

# Lymphocyte Gating Strategy

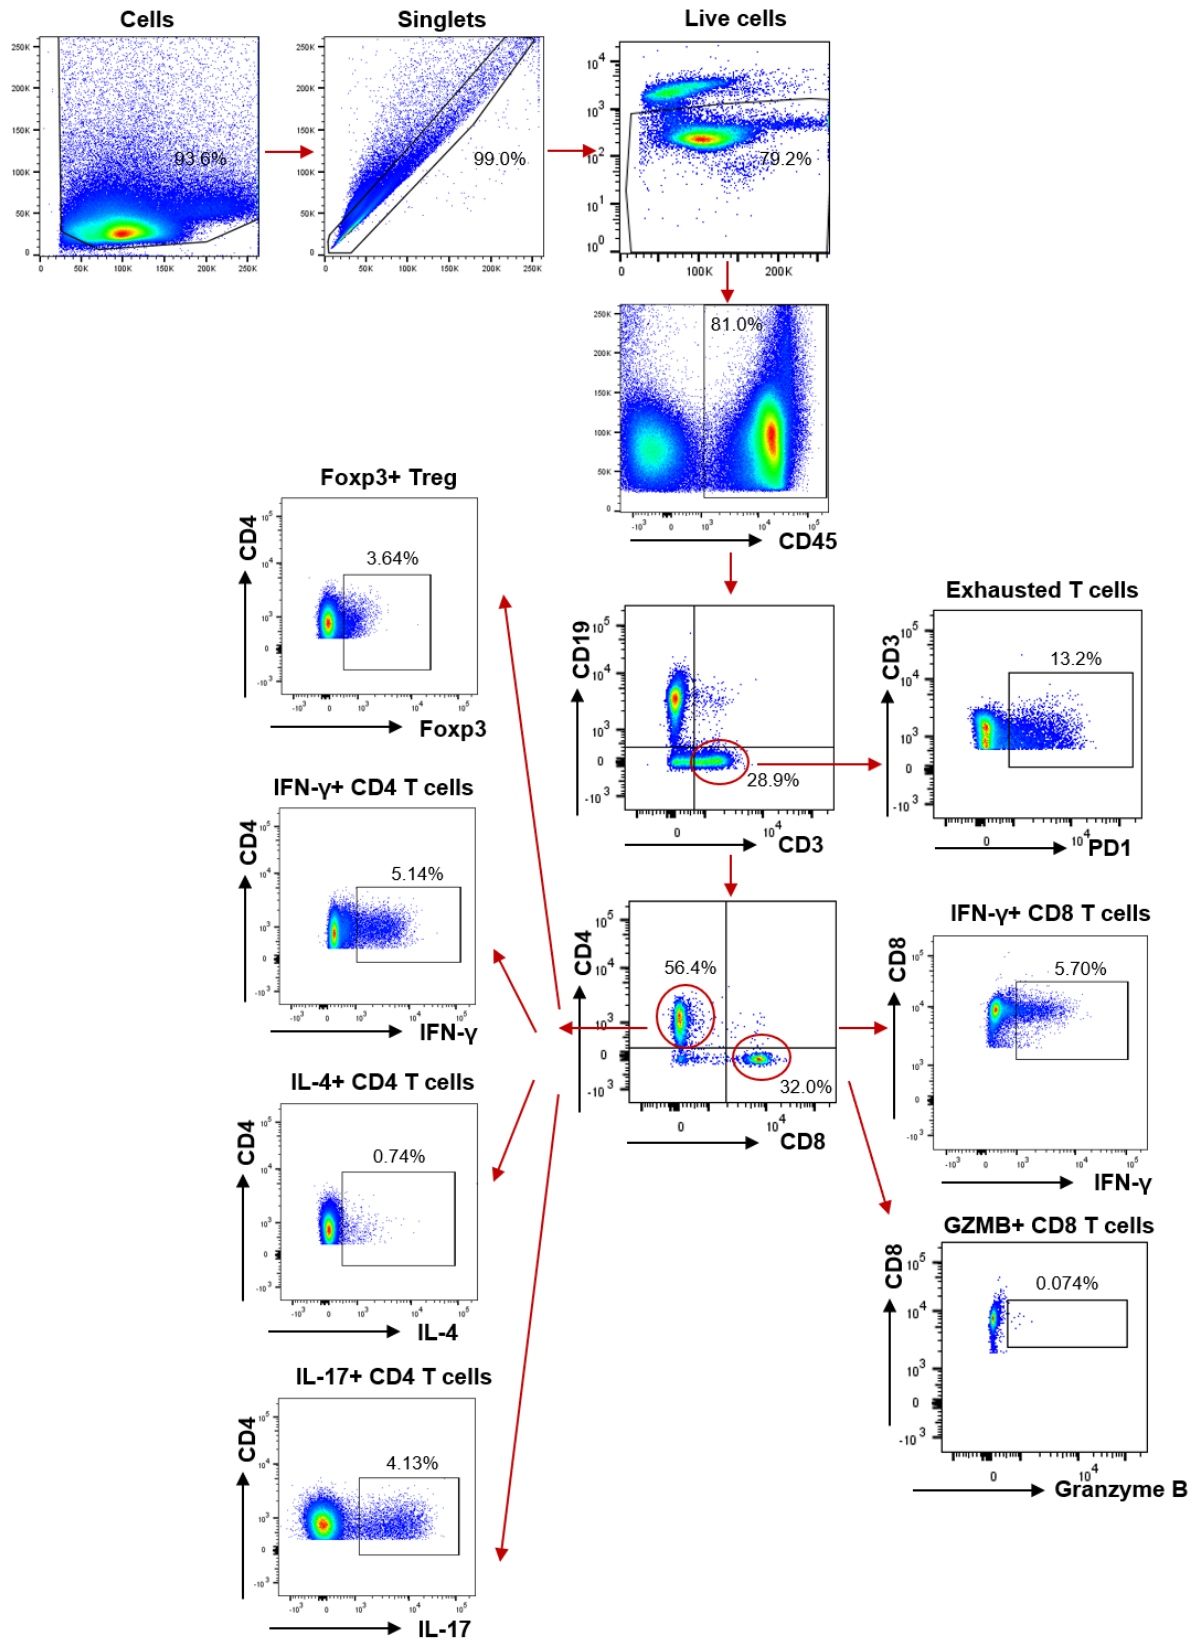

B

### Myeloid Cell Gating Strategy

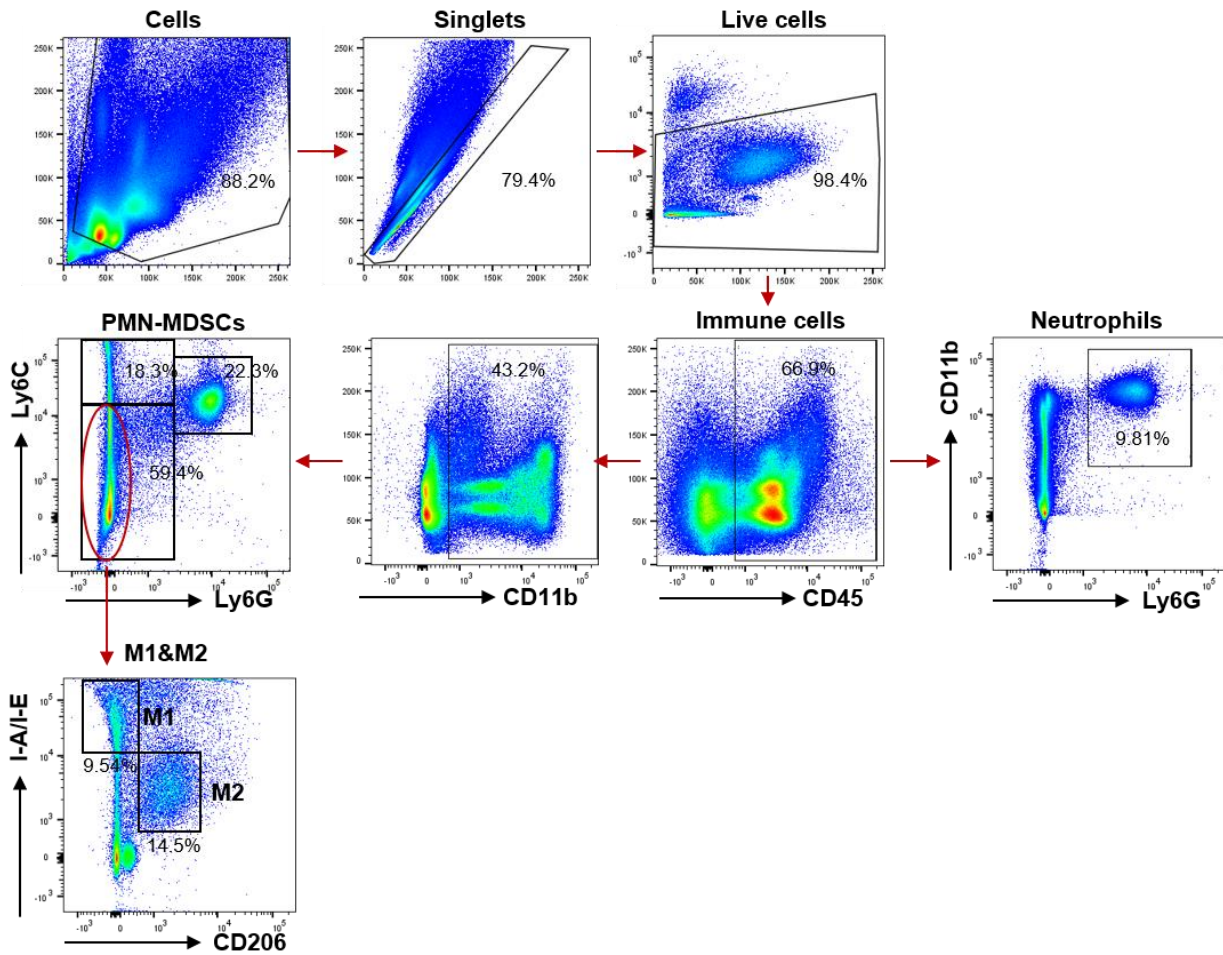

**Supplementary Figure S6.** Flow cytometry gating strategy for (A) lymphocytes and (B) myeloid cells.



**Supplementary Table S1. List of antibodies used for the flow cytometry.**

| <b>Flow cytometry</b>   |              |                     |                        |
|-------------------------|--------------|---------------------|------------------------|
| <b>Lymphocyte Panel</b> |              |                     |                        |
| <b>Antibody</b>         | <b>Clone</b> | <b>Flourescence</b> | <b>Dilution Factor</b> |
| Ghost Dye™              | --           | Violet 510          | 1:150                  |
| CD45.2                  | 104          | redFluor 710        | 1:100                  |
| CD3                     | 17A2         | PerCP-Cy5.5         | 1:100                  |
| CD4                     | GK1.5        | APC-Cy7             | 1:100                  |
| CD8a                    | 53-6.7       | PB                  | 1:100                  |
| CD19                    | 1D3          | APC                 | 1:100                  |
| IFN- $\gamma$           | XMG1.2       | FITC                | 1:100                  |
| IL-4                    | BVD6-2462    | PE-Cy7              | 1:100                  |
| IL-17A                  | TC11-18H10   | BV786               | 1:100                  |
| FoxP3                   | FJK-16S      | PE                  | 1:100                  |
| PD1                     | RMP1-30      | BV711               | 1:100                  |
| Granzyme B              | NGZB         | PE-eFluor 610       | 1:100                  |
| <b>Myleoid Panel</b>    |              |                     |                        |
| <b>Antibody</b>         | <b>Clone</b> | <b>Flourescence</b> | <b>Dilution Factor</b> |
| Ghost Dye™              | --           | Violet 510          | 1:100                  |
| CD45.2                  | 104          | redFluor 710        | 1:100                  |
| CD11b                   | M1/70        | FITC                | 1:100                  |
| CD11c                   | N418         | PE-Cy7              | 1:100                  |
| Ly6C                    | HK1.4        | APC                 | 1:100                  |
| Ly6G                    | 1A8          | PE                  | 1:100                  |
| CD206                   | C068C2       | BV421               | 1:100                  |
| I-A/I-E                 | M5/114.15.2  | BV711               | 1:100                  |

**Supplementary Table S2. List of primers used in qRT-PCR.**

| <b>Gene</b>                   | <b>Forward</b>                 | <b>Reverse</b>                |
|-------------------------------|--------------------------------|-------------------------------|
| <i>Actb</i> ( $\beta$ -actin) | 5'GGCTGTATTCCCCTCCATCG3'       | 5'CCAGTTGGTAACAATGCCATGT3'    |
| <i>Cd45</i>                   | 5'ACCACCAGGTGAATGTCAATTT3'     | 5'CTTGCTTTCCCTCGGTTCTTT3'     |
| <i>Ym1</i>                    | 5'CAAGTTGAAGGCTCAGTGGCTC3'     | 5'CAAATCATTGTGTAAAGCTCCTCTC3' |
| <i>Mrc1</i> ( <i>Cd206</i> )  | 5'TTGGACGGATAGATGGAGGG3'       | 5'CCAGGCAGTTGAGGAGGTTC3'      |
| <i>Cd8a</i>                   | 5'CTGCGTGGCCCTTCTGCTGTCCT3'    | 5'GGGACATTTGCAAACACGCT3'      |
| <i>Cd4</i>                    | 5'GAAGATTCTGGGGCAGCATGGCAAAG3' | 5'TTTGGAATCAAACGATCAA3'       |
| <i>Pdcd1</i> ( <i>Pd1</i> )   | 5'ACCCTGGTCATTCACCTGGG3'       | 5'CATTTGCTCCCTCTGACACTG3'     |
| <i>Il6</i>                    | 5'CTGATGCTGGTGACAACCAC3'       | 5'CAGACTTGCCATTGCACAAC3'      |
| <i>IkBa</i>                   | 5'CAGCAGACTCCACTCCACTT3'       | 5'GAGAGGGGTATTTCTCCTCGAA3'    |
